# Supplementary material
Source: PubMed Central journal article supplement (PMC4815625)

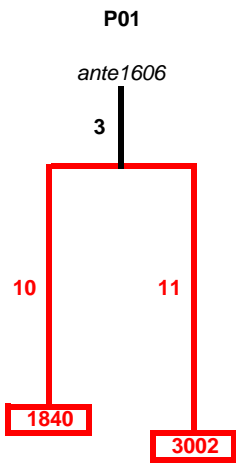

NG = 21; NM = 0

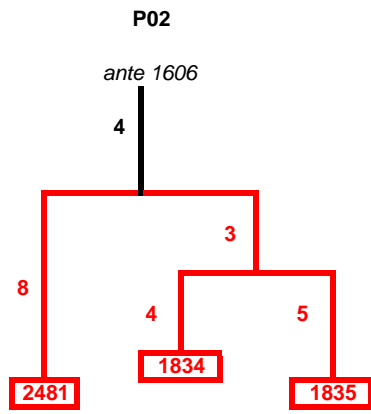

NG = 20; NM = 0

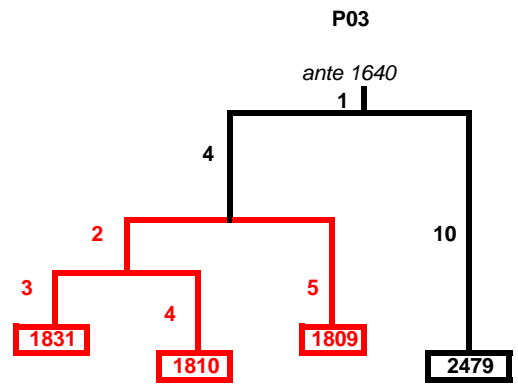

NG = 14; NM = 2

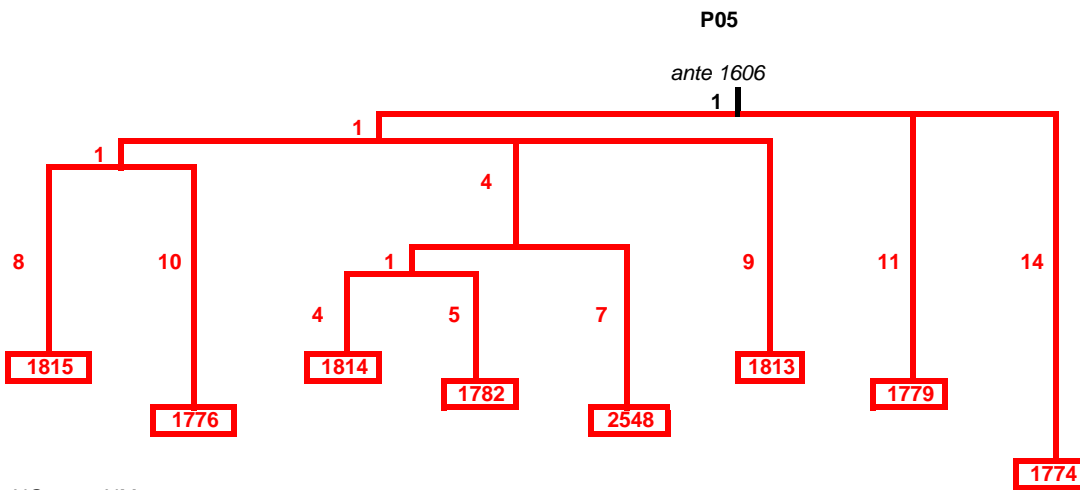

NG = 75; NM = 3

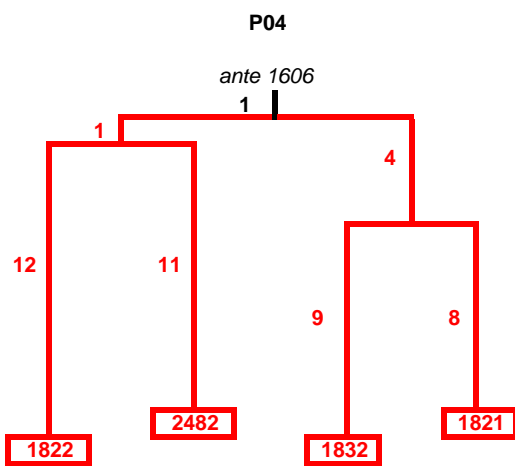

NG = 45; NM = 6

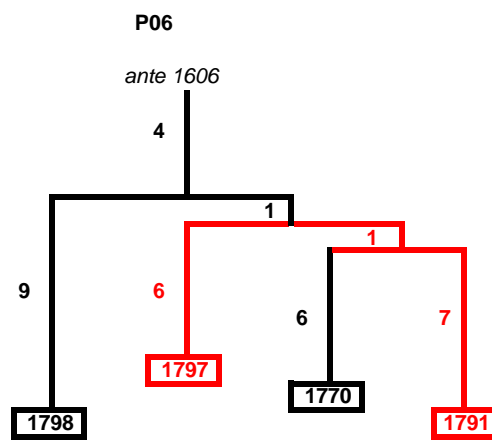

NG = 14; NM = 0

P07

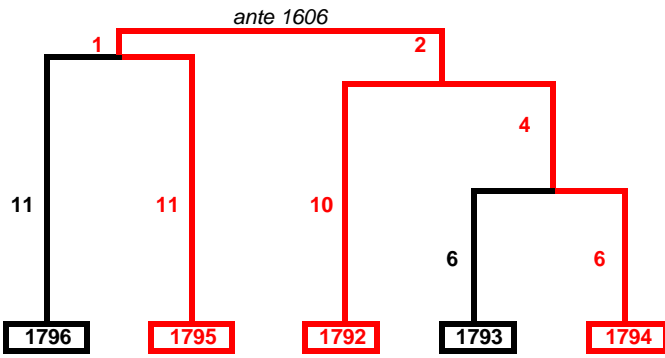

NG = 34; NM = 3

P08

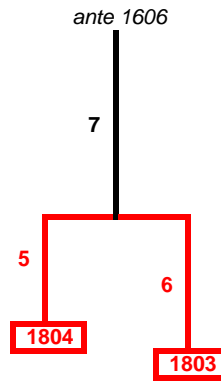

NG = 11; NM = 0

P09

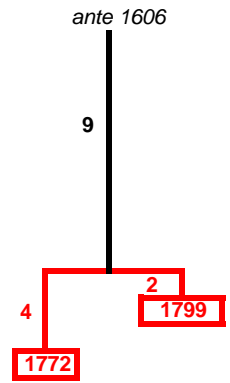

NG = 6; NM = 1

P10

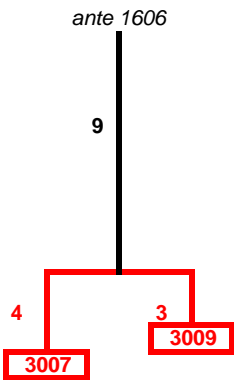

NG = 7; NM = 1

P11

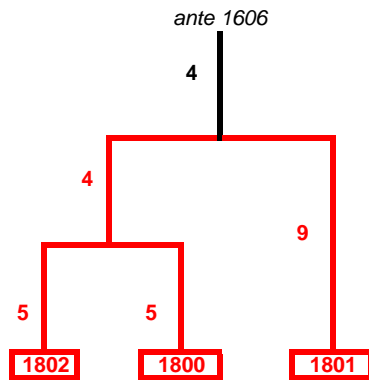

NG = 23; NM = 4

P12

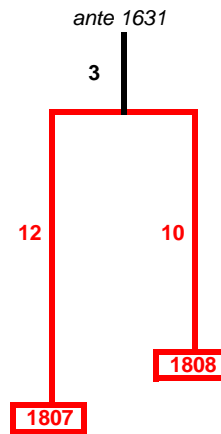

NG = 22; NM = 2

P13

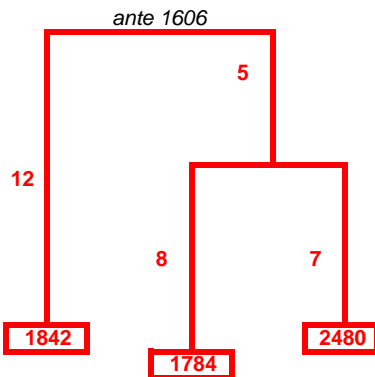

NG = 32; NM = 0

P14

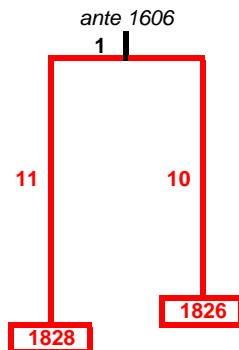

NG = 21; NM = 2

P15

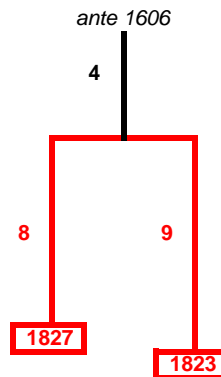

NG = 17; NM = 0

Supplement: hdy201477x9.pdf [file hdy201477x9.pdf]
